# Supplementary material for: Reinforcement learning in crystal structure prediction
Source: Royal Society of Chemistry journal article supplement (doi:10.1039/d3dd00063j), 2023-01-01
Supplement: d3dd00063j1.pdf [file d3dd00063j1.pdf]

# Supplementary Information for: Reinforcement Learning in Crystal Structure Prediction

## Supplementary Note 1. RL-CSP hyperparameters.

The following list contains the hyperparameters of RL-CSP with the proposed default values:

- $\alpha = 0.0005$ ; the learning rate (see formula 1);
- $h\_type = 'linear'$ ; the type of action preferences function;
- $free\_term = 1$ ; free term coefficient in  $h$  function;
- $\beta = 1$ ;  $\beta$  from updating rule 1 reflects how much the updating rule relies on entropy regularization;
- $e\_threshold = 0.8$ ; the entropy threshold for the entropy regularization mechanism; if the entropy is higher then it does not used in updating rule 1;
- $scale\_reward = True$ ; the option turning on reward normalization;
- $\epsilon = 0.1$ ; the proportion with which the uniform policy is used instead of the RL-CSP policy;
- $smart\_penalty = True$ ; the penalty is calculated as described in the Methods section;
- $zero\_reward\_penalty = 0$ ; if  $smart\_penalty = False$  this hyperparameter's value is used instead of the reward if the reward is calculated as zero;
- $non\_unique\_penalty = 0$ ; if  $smart\_penalty = False$  this hyperparameter is used instead of the reward if the new observed state was met before and this parameter is not zero;
- $non\_converge\_penalty = 0$ ; if  $smart\_penalty = False$  this hyperparameter is used instead of the reward if the energy calculation did not converge;
- $step\_reward\_limit = 5000$ ; this parameter is used if  $scale\_reward = True$  and states the number of rewards utilized for the reward scaling;

RL-CSP in FUSE set the hyperparameters as we described above. For MC-EMMA along with increasing the learning rate up to 0.01 the other hyperparameters were simplified, specifically,  $scale\_reward$  and all kind of penalties were turned off and  $free\_term$  was set zero. Even in this simplified setting RL-CSP is still able to demonstrate the improvement that is reported in the paper. Potentially, the performance gains will be higher by optimising these parameters further, but such investigation goes beyond the scope of this work.

## Supplementary Note 2. Local structure optimisations.

In this work all local structure optimisations were performed using the GULP code<sup>4</sup>. For the optimisation, all energies were calculated using pairwise interatomic potentials, with the Buckingham potential for the short-range interactions, with all potentials having a cut-off radius of 12 Å, unit cell parameters and atomic positions were optimised until the norm of gradient on forces was lower than 0.001(a.u.). Supplementary Tables 1 and 2 give details of the individual runs performed in this work using respectively FUSE and MC-EMMA. Interaction parameters for these calculations with FUSE and MC-EMMA are shown in Supplementary Tables 3 and 4 respectively. The final optimized structures for all runs are placed on GitHub: [https://github.com/lrcfmd/FUSE\\_RL/blob/main/lowest\\_energy\\_structures.zip](https://github.com/lrcfmd/FUSE_RL/blob/main/lowest_energy_structures.zip) [https://github.com/lrcfmd/MC-EMMA-RL/blob/master/YBa2Ca2Fe5O13\\_lowet\\_energy\\_structures.zip](https://github.com/lrcfmd/MC-EMMA-RL/blob/master/YBa2Ca2Fe5O13_lowet_energy_structures.zip) .

### Supplementary Note 3. The Flexible Unit Structure Engine (FUSE).

FUSE assembles crystal structures from small building blocks of atoms called submodules, derived based on chemical knowledge, each of the eight position motifs contains positions for 1 cation (the cation position can be assigned as vacant) and 0–3 anions arranged in a planar grid. When submodules are generated, the species on each specific site is randomly allocated. The submodules are grouped together to assemble single atom thick layers called modules, which are in turn stacked on top of each other to create a full crystal structure. Potential structures are then explored using a modification of a Monte Carlo search (Fig. 3):

1. Instead of using one random structure as a start point, FUSE generates an initial, randomly generated population of structures, which are all then locally optimised. The lowest energy structure from the initial population is then carried forwards as the evolving structure.
2. The BH routine includes a stage inspired by simulated annealing; to avoid the search getting trapped in local minimum, once FUSE has visited 500 structures since its last downhill step it initiates a “melt”, where the temperature parameter ( $kT$ ) in the MC accept stage is steadily increased to allow for steep increases in energy, the temperature parameter is then reset once a subsequent downhill step is taken.

When FUSE generates a structure, either randomly or through one of the actions listed below, it will “error check” the proposed new structure for the co-ordination chemistry of all of the cation – anion environments. If greater than 25% of the cations are found to have an incorrect co-ordination, FUSE will not accept the random structure and will repeat the process starting from the action selection. Note: this error checking procedure can then often result in the actual percentage of each action (see below) selected when running the MC search deviating away from that set in the input file by any fixed policy making it difficult to ensure a uniform probability distribution among actions.

In FUSE, there are nine possible action types for possible structures, labelled with numbers within the code. In the FUSE study<sup>1</sup> three of the actions are united by number 1 due to their similarity, and the default probability of each action being selected is stated in brackets, rounded to the nearest percent:

- 1: (in the FUSE study<sup>1</sup>) (51%) Swap the position of two or more atoms (of different species) within the structure. There is an 8: 3: 1 probability of swapping; two atoms, a random number between three and  $n-1$  (where  $n$  is the total number of atoms in the structure) and all of the atoms in the structure.
- 2: (14%) Swap the positions of two randomly chosen submodules within the structure.
- 3: (9%) Each structure in FUSE contains a set of “building instructions” which indicate how the submodules are to be assembled: the dimensions of the unit cell (in submodules) and a translation applied to each full module to prevent atoms being placed atop each other. This action generates a new set of instructions while retaining the current set of sub-modules.
- 4: (9%) Swap the positions of two full modules.
- 5: (9%) Double the structure along one of the three crystallographic axes (chosen at random). This action can only be used when the total number of atoms is under half of the maximum permitted in the calculation.
- 6: (6%) Generate a random new structure, limiting the maximum number of atoms to be equal to the current structure.
- 7: (3%) Generate a random new structure.

Additional updates were made to the code of FUSE to work correctly with reinforcement learning.

**Update 1.** As stated above, when an action has been applied and the proposed structure fails the error check stage, FUSE restarts the process to select and perform an action on a structure, which can result in the actual actions used differing significantly from the probabilities chosen in the input file. For RL-CSP and Uniform, the code has been updated such that when a proposed structure is rejected, the same action is performed again (starting from the current structure) until the action obtains a structure which passes the error check.

**Update 2.** In order to learn the preferences among different types of swaps in action 1 this action was split into and replaced by three separate actions:

**1** (in this study): (34%) Swap the positions of two atoms.

**9:** (13%) Swap random number between three and  $N-1$  atoms where  $N$  is the number of atoms in a unit cell.

**10:** (4%) Swap the positions of all atoms.

The default probabilities of the updated and new actions being selected are stated in brackets (rounded to the nearest percent) and are equal to those for the corresponding branch of action 1 before update. FUSE with the Original policy uses the default probabilities (Fig. 4a) whereas FUSE with the Uniform policy works and RL-CSP policy starts with equal probabilities for all nine actions.

Note: the action numbering reflects that labelling used within the code. At the time of writing there is an action 8 in development, but not fully functional, so it was not used within this study. To keep this work as accessible as possible, we decided to retain the numbering as used in the version of the code associated the FUSE study<sup>1</sup>.

**Update 3.** In order to avoid wasting compute time, we created an input option to force the BH to stop once a target energy has been obtained, allowing us to stop a run if the global minimum structure had been located, which we know in advance due to the previous work on the benchmark examples.

RL-CSP is embedded into FUSE BH routine in two places highlighted in Fig. 3. First, the RL-CSP policy is used to select a new action. Then, after the energy calculation for the trial structure, RL-CSP updates its policy according to the trial structure energy.

#### **Supplementary Note 4. Monte Carlo Extended Module Materials Assembly (MC-EMMA).<sup>2</sup>**

MC-EMMA assembles crystal structures using full modules as the fundamental building block. Once a set of modules is chosen, they are then assembled along one stacking direction. Unlike FUSE, in MC-EMMA, modules are user-defined, and are typically chosen based on fragments of known crystal structures, with each provided in the input file as either a .cif file or ase<sup>3</sup> Atoms object. In this work all modules are used as presented previously.<sup>2</sup> Structures are then permuted in MC-EMMA using an MC search, with six possible actions used to permute the structure (Supplementary Fig. 2). For clarity, these are listed as labelled within the code, and the default probability of each action being selected stated in brackets, rounded to the nearest percent:

**T1:** (29%) Select two modules of different types in the structure and swap their location.

**T2:** (21%) Randomise the stacking sequence of all the modules in the structure.

**T3:** (21%) Attempt to swap a module in the structure for one of a different type.

**T4:** (14%) Generate a random new structure, retaining the number of modules in the structure that are currently being used.

**T5:** (7%) Double the length of the structure, this action can only be used when the current structure contains under half of the maximum number of modules permitted in the calculation (set in the input file).

**T6:** (7%) Generate an entirely new random structure.

The only change to the original MC-EMMA code that was made before embedding RL-CSP is the same update as Update 3 for FUSE; the additional input parameter indicates the target energy achieving which MC-EMMA stops calculations. RL-CSP was embedded into MC-EMMA in two stages reflected on the general BH Fig. 3.

The policy sharing between 40 runs of MC-EMMA with RL-CSP is organised via the common policy vector  $\theta$ . All runs start simultaneously but choose the initial structure independently. Each run follows its own trajectory (sequence of structures and actions) and does not consider the trajectories of other runs. Given the current structure, a run selects an action according to the shared policy  $\theta$ , observes a new structure and updates  $\theta$  according to the reward obtained. When the run finds the global minimum, it stops while other working runs continue following their own trajectories in which they did not find the global minimum yet. Fig. 7e demonstrates the shared policy learned by 40 runs of MC-EMMA with RL-CSP.

### Supplementary Note 5. Numbers of steps in runs.

This note explains the numerical results of the RL-CSP policy benchmarking provided in Supplementary Tables 1 and 2, which were utilized to calculate the numbers displayed in Figs. 5a and 7a respectively.

For FUSE, 3 policies were tested on 5 compositions each. The three tested policies are as follows:

- Original; the fixed policy tuned by hand for composition  $Y_2Ti_2O_7$  and used in the original FUSE study<sup>1</sup>;
- Uniform; the fixed policy with equal probabilities for each of the 9 actions to be selected;
- RL-CSP; the dynamic policy, that starts from the Uniform policy and improves during the CSP run via Reinforcement Learning.

Each policy was tested for the five compositions below:

- $Sr_4Ti_3O_{10}$
- $Y_2TiO_5$
- $Y_2Ti_2O_7$
- $SrY_2O_4$
- $Y_2O_3$

Each policy-composition pair was tested in 40 independent runs of FUSE. Each run was allotted a minimum of 90,000 steps to discover the global minimum but was stopped earlier if it was located. Supplementary Table 1 contains the numbers of steps in all runs of FUSE in ascending order for each policy-composition pair. If the global minimum was not found in a specific run, the number is coloured in red. The bottom row of Supplementary Table 1 shows the mean number of steps among 40 runs (12 fastest for  $Y_2O_3$ ) rounded to the nearest integer. These numbers represent  $N_{mean}$ , the mean number of steps required to find the global minimum, which is used in

the main text to compare the policies for all policy-composition pairs except  $\text{SrY}_2\text{O}_4$  with the Original policy and  $\text{Y}_2\text{O}_3$  with the Uniform policy where only the lower bound is provided.

The sums of  $N_{\text{mean}}$  for all compositions of FUSE under different policies are provided in the bottom row of the table in Fig. 5a. These sums are utilized to evaluate the performance of policies for the task of exploration across compositions of a phase field and are highlighted in red if only the lower bound is provided. The last two columns of the table in Fig. 5a contain the percentage of the steps used in the policy RL-CSP compared to the Original and Uniform policies. Green and red colours indicate percentages when RL-CSP takes respectively fewer or more steps than the policy it is being compared to.

For MC-EMMA, 3 following policies were tested for composition  $\text{YBa}_2\text{Ca}_2\text{Fe}_5\text{O}_{13}$ :

- Original; the fixed policy tuned by hand and used in the MC-EMMA study<sup>2</sup>;
- Uniform; the fixed policy with equal probabilities for each of 6 actions to be selected;
- RL-CSP; the dynamic policy learned on the fly.

The Original and Uniform policies were tested in 40 independent runs of MC-EMMA. As for RL-CSP, 40 runs of this policy functioned independently as well but were initiated simultaneously and utilized and improved upon the same policy vector, sharing the learning process.

Supplementary Table 2 displays the lengths of all runs, sorted in ascending order for each policy. The bottom row represents the mean among 40 entries rounded to the nearest integer and displayed in Fig. 7a as well. These numbers were used to evaluate the performance of RL-CSP in comparison to the fixed policies in MC-EMMA.

### **Supplementary Note 6. Computational setup.**

The RL-CSP code was written in Python and requires MySQL server to store the learning process variables. The University of Liverpool parallel Linux cluster nodes (two 20-cores Intel(R) Xeon(R) Gold (6138 CPU @ 2.00GHz) processors and 384 Gb memory each node) connected by a 100 gbit/s OmniPath network were used to run the code.

FUSE with different policies and compositions was run 600 times (40 runs for each of 3 policies and 5 compositions) allowing minimum 90,000 steps of BH search and was stopped earlier if the global minimum was found. The typical run of the fastest composition ( $\text{Sr}_4\text{Ti}_3\text{O}_{10}$ ) took ~24 hours whereas for the slowest composition ( $\text{Y}_2\text{O}_3$ ), where only 30% (12 / 40) of runs on average manage to find the global minimum in 90,000 steps, the remaining runs took ~45 days till they passed 90,000 limit.

MC-EMMA with different policies and one composition was run 120 times (40 runs for each of 3 policies) and all 120 runs stopped when the global minimum was found.

**Supplementary Figure 1. Efficiency of different FUSE policies at the compositions  $\text{Sr}_4\text{Ti}_3\text{O}_{10}$ ,  $\text{Y}_2\text{TiO}_5$ , and  $\text{Y}_2\text{Ti}_2\text{O}_7$ .**

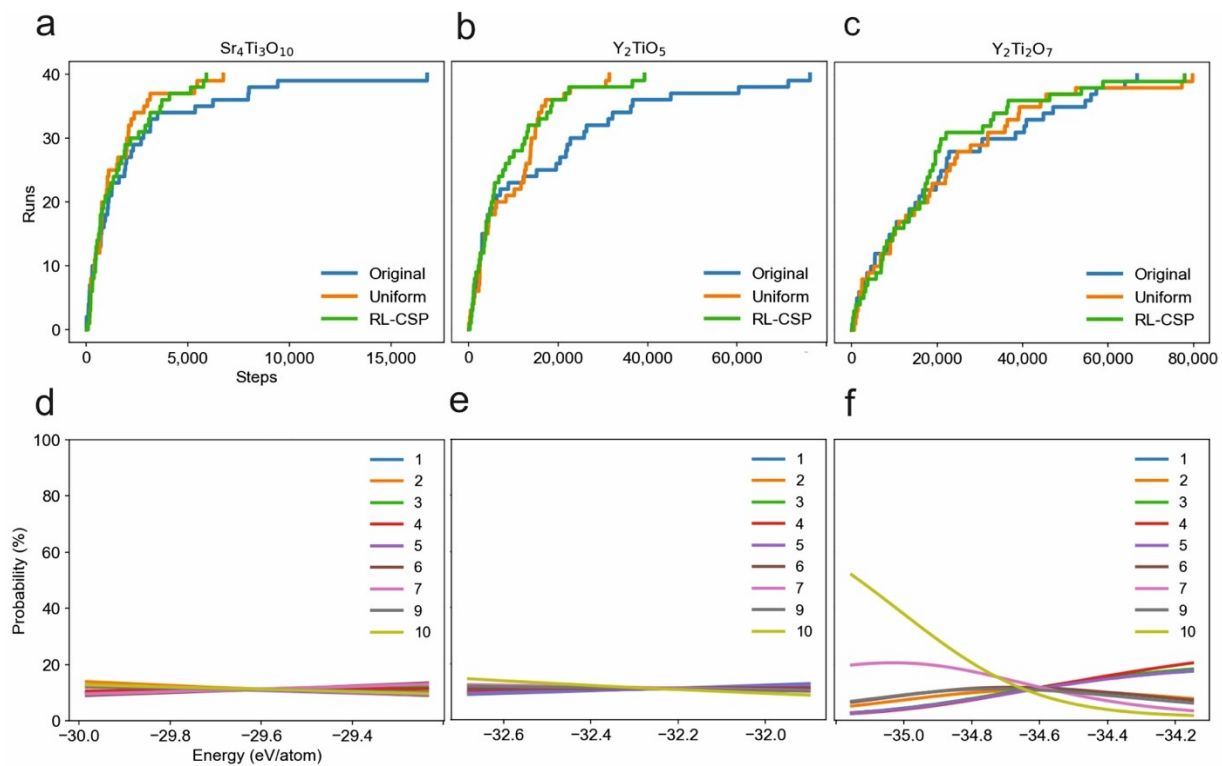

**a, b,** and **c** show how many runs have found the global minimum in the given number of steps. **b, e,** and **f** show the final policies learnt by RL-CSP for  $\text{Sr}_4\text{Ti}_3\text{O}_{10}$  (**d**),  $\text{Y}_2\text{TiO}_5$  (**e**), and  $\text{Y}_2\text{Ti}_2\text{O}_7$  (**f**) at the end of a typical RL-CSP run.

**Supplementary Figure 2. Actions for MC-EMMA.**

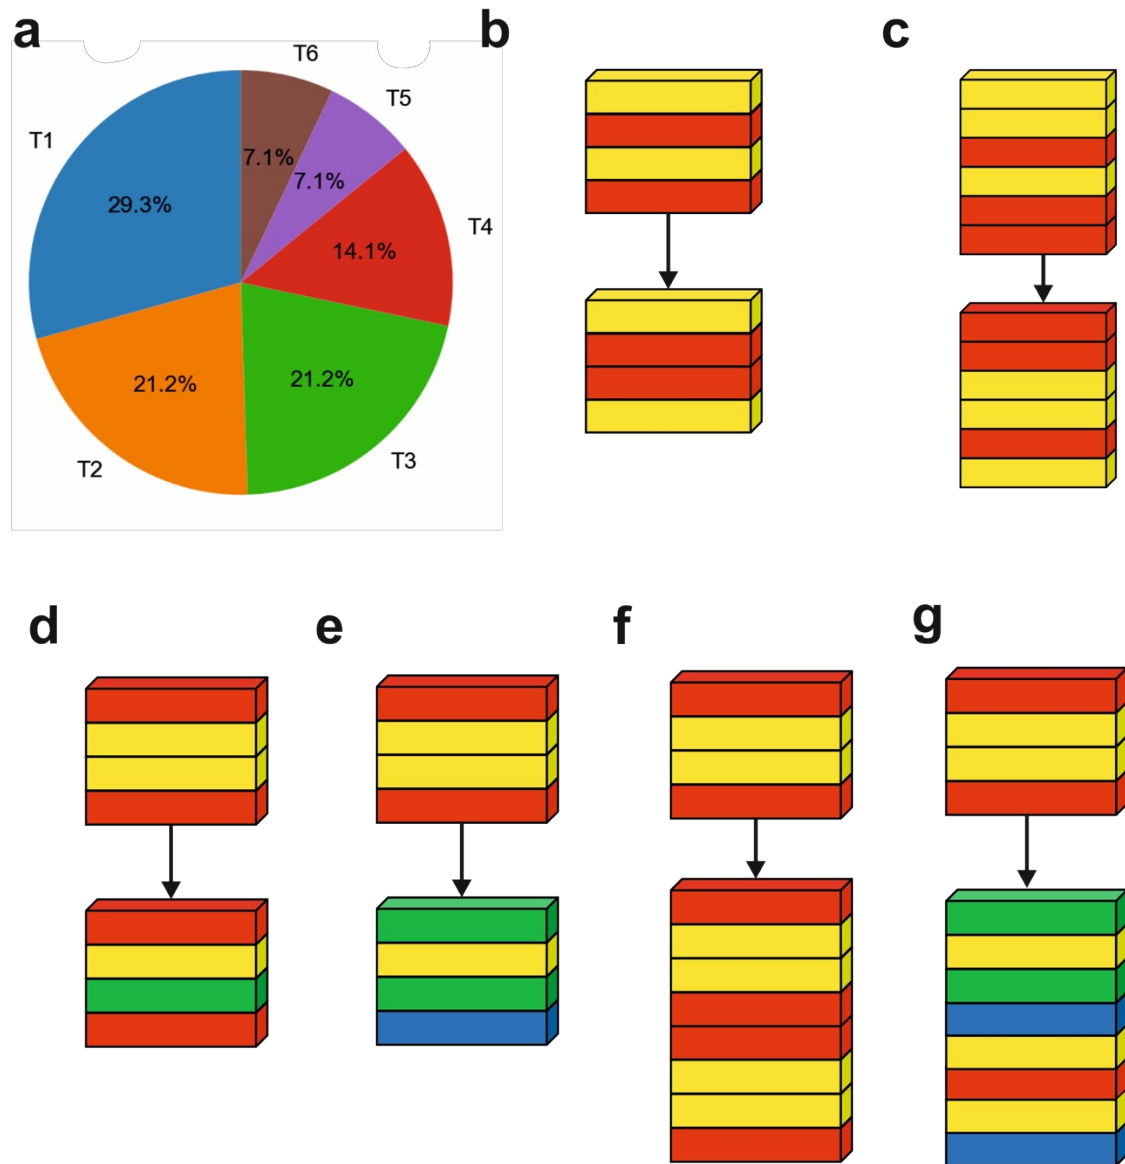

**a**, The Original fixed policy probabilities for six possible actions.<sup>2</sup> **b**, “T1”, The position of two modules within the structure are switched. **c**, “T2”, The module sequence for the current structure is randomized. **d**, “T3”, One module within the structure is swapped for one of a different type from the input file. **e**, “T4”, The current structure is replaced by a new random structure containing the same number of modules. **f**, “T5”, The structure is doubled along the stacking direction, so long as the current structure contains half or fewer of the maximum number of modules permitted from the input file. **g**, “T6”, The current structure is replaced by a new random structure by the maximum number of modules permitted in the input file.

**Supplementary Table 1. The number of steps in FUSE by policy and composition.** For a given policy-composition pair, each column contains the numbers of steps required to find the global minimum in 40 runs of FUSE in ascending order. The bottom row highlighted in grey shows the mean number of steps among all 40 runs for compositions  $\text{Sr}_4\text{Ti}_3\text{O}_{10}$ ,  $\text{Y}_2\text{TiO}_5$ ,  $\text{Y}_2\text{Ti}_2\text{O}_7$ ,  $\text{SrY}_2\text{O}_4$  and the mean among the first 12 entries (the 12 shortest runs) for  $\text{Y}_2\text{O}_3$ . The numbers in red indicate the runs over 90,000 steps that did not reach the global minimum.

| $\text{Sr}_4\text{Ti}_3\text{O}_{10}$ |         |        | $\text{Y}_2\text{TiO}_5$ |         |        | $\text{Y}_2\text{Ti}_2\text{O}_7$ |         |        | $\text{SrY}_2\text{O}_4$ |         |        | $\text{Y}_2\text{O}_3$ |         |        |
|---------------------------------------|---------|--------|--------------------------|---------|--------|-----------------------------------|---------|--------|--------------------------|---------|--------|------------------------|---------|--------|
| Original                              | Uniform | RL-CSP | Original                 | Uniform | RL-CSP | Original                          | Uniform | RL-CSP | Original                 | Uniform | RL-CSP | Original               | Uniform | RL-CSP |
| 7                                     | 87      | 76     | 159                      | 25      | 280    | 81                                | 607     | 223    | 7782                     | 104     | 569    | 3348                   | 28399   | 7864   |
| 7                                     | 160     | 145    | 457                      | 217     | 509    | 280                               | 963     | 326    | 35702                    | 920     | 815    | 4543                   | 34049   | 16585  |
| 102                                   | 178     | 162    | 473                      | 420     | 659    | 595                               | 1212    | 569    | 40066                    | 3677    | 1234   | 5013                   | 34900   | 18850  |
| 110                                   | 205     | 198    | 885                      | 787     | 794    | 1140                              | 1475    | 979    | 41769                    | 4034    | 1490   | 6698                   | 43653   | 23581  |
| 144                                   | 212     | 204    | 1013                     | 1168    | 978    | 1221                              | 1961    | 1927   | 43459                    | 4591    | 1593   | 14007                  | 67431   | 25372  |
| 156                                   | 214     | 204    | 1308                     | 1188    | 1077   | 1742                              | 1983    | 2847   | 46613                    | 4799    | 2345   | 15183                  | 77912   | 25952  |
| 170                                   | 230     | 296    | 1846                     | 2254    | 1125   | 2530                              | 2379    | 3228   | 48876                    | 6720    | 4658   | 32085                  | 80567   | 26343  |
| 226                                   | 242     | 304    | 1956                     | 2409    | 1296   | 2802                              | 2439    | 3763   | 51354                    | 6737    | 4872   | 38018                  | 83045   | 39231  |
| 282                                   | 367     | 372    | 1977                     | 2479    | 1621   | 3609                              | 3886    | 5733   | 65258                    | 8148    | 4977   | 46699                  | 86823   | 57737  |
| 291                                   | 385     | 441    | 2246                     | 2489    | 2146   | 4506                              | 5202    | 6906   | 66167                    | 8203    | 5352   | 53940                  | 90361   | 63980  |
| 453                                   | 410     | 446    | 2493                     | 2527    | 2382   | 5431                              | 6765    | 7003   | 78121                    | 9992    | 8552   | 62408                  | 90700   | 73070  |
| 463                                   | 467     | 481    | 2726                     | 2567    | 2639   | 5450                              | 6797    | 7294   | 116869                   | 10457   | 9498   | 67441                  | 91195   | 74907  |
| 550                                   | 655     | 481    | 2947                     | 3330    | 3340   | 8172                              | 9032    | 7600   | 96619                    | 11613   | 13945  | 71678                  | 91838   | 90106  |
| 705                                   | 664     | 527    | 2990                     | 3497    | 3448   | 8779                              | 9034    | 8198   | 100898                   | 12813   | 15368  | 79608                  | 92081   | 90191  |
| 711                                   | 670     | 607    | 3004                     | 3558    | 3733   | 8829                              | 9621    | 9422   | 101234                   | 13496   | 15954  | 87940                  | 92223   | 90394  |
| 748                                   | 703     | 663    | 4097                     | 4278    | 3879   | 10209                             | 10230   | 9910   | 101947                   | 13903   | 16102  | 90012                  | 92552   | 90445  |
| 863                                   | 740     | 695    | 4111                     | 4416    | 3918   | 10491                             | 11047   | 12229  | 103248                   | 14395   | 16553  | 90028                  | 93827   | 91078  |
| 932                                   | 752     | 697    | 4213                     | 4426    | 4501   | 13436                             | 12669   | 13326  | 103289                   | 14601   | 17660  | 90031                  | 93833   | 91784  |
| 1039                                  | 755     | 786    | 4752                     | 5910    | 5019   | 13484                             | 14662   | 13989  | 104324                   | 15566   | 18435  | 90047                  | 93990   | 92206  |
| 1072                                  | 762     | 847    | 6114                     | 6021    | 5076   | 14887                             | 15578   | 15914  | 105375                   | 16616   | 18544  | 90048                  | 94079   | 93160  |
| 1105                                  | 930     | 954    | 6232                     | 8315    | 5422   | 15819                             | 17777   | 16994  | 105891                   | 23648   | 19181  | 90058                  | 95967   | 93879  |
| 1243                                  | 1000    | 1095   | 7045                     | 10185   | 5644   | 16661                             | 18250   | 17022  | 106563                   | 23683   | 21189  | 90063                  | 96794   | 94007  |
| 1260                                  | 1036    | 1212   | 8866                     | 11687   | 5808   | 19730                             | 18860   | 17240  | 108430                   | 30355   | 21540  | 90065                  | 97272   | 94211  |
| 1611                                  | 1041    | 1336   | 12219                    | 12337   | 6717   | 20339                             | 21940   | 17704  | 109445                   | 32518   | 21905  | 90070                  | 97752   | 94487  |
| 1879                                  | 1100    | 1501   | 15184                    | 12526   | 7631   | 20867                             | 22181   | 18311  | 109473                   | 33041   | 22155  | 90080                  | 98606   | 96126  |
| 1923                                  | 1510    | 1599   | 19562                    | 12813   | 8212   | 22181                             | 23005   | 19009  | 109481                   | 33751   | 22245  | 90090                  | 98969   | 96413  |
| 1974                                  | 1560    | 1732   | 20434                    | 13684   | 9105   | 22262                             | 24169   | 19590  | 115286                   | 35527   | 29958  | 90097                  | 99175   | 96807  |
| 2210                                  | 1968    | 1879   | 21748                    | 13816   | 10081  | 22806                             | 24708   | 19604  | 115417                   | 35534   | 30757  | 90111                  | 99266   | 97014  |
| 2307                                  | 1993    | 1907   | 22034                    | 13875   | 11972  | 30003                             | 27805   | 20532  | 116258                   | 42128   | 31551  | 90170                  | 99445   | 97184  |
| 2694                                  | 1993    | 2165   | 22719                    | 14009   | 12477  | 30543                             | 31859   | 20847  | 124046                   | 44084   | 34670  | 90170                  | 100373  | 97276  |
| 2816                                  | 2069    | 2575   | 25808                    | 14874   | 13030  | 38346                             | 31881   | 22099  | 125698                   | 47211   | 36233  | 90261                  | 101097  | 97830  |
| 3146                                  | 2084    | 2899   | 26338                    | 14929   | 13307  | 40379                             | 35843   | 30676  | 131737                   | 48705   | 36424  | 90281                  | 102429  | 98441  |
| 3157                                  | 2209    | 3070   | 31211                    | 15379   | 15754  | 40862                             | 36417   | 32577  | 132034                   | 55177   | 37291  | 90450                  | 102849  | 98583  |
| 3504                                  | 2356    | 3140   | 32164                    | 15666   | 17462  | 44872                             | 39032   | 33224  | 134841                   | 58157   | 41977  | 90559                  | 103398  | 99270  |
| 5356                                  | 2836    | 3631   | 36233                    | 16315   | 18364  | 47136                             | 39245   | 36328  | 136952                   | 61456   | 46715  | 90971                  | 103488  | 99455  |
| 6235                                  | 3007    | 3718   | 36674                    | 17182   | 18665  | 54665                             | 44215   | 36614  | 137727                   | 61732   | 53051  | 91514                  | 104295  | 99501  |
| 7968                                  | 3140    | 4090   | 45187                    | 21290   | 21680  | 56010                             | 45511   | 46339  | 142249                   | 75624   | 56744  | 91826                  | 106834  | 99697  |
| 8006                                  | 5322    | 5135   | 60372                    | 22704   | 22399  | 57263                             | 52451   | 53747  | 143392                   | 109865  | 62498  | 92824                  | 109221  | 99929  |
| 9422                                  | 5457    | 5773   | 71459                    | 30664   | 36582  | 63949                             | 77270   | 58797  | 143555                   | 125524  | 68261  | 93238                  | 112244  | 99991  |
| 16775                                 | 6743    | 5910   | 76324                    | 31448   | 39312  | 66795                             | 79769   | 77909  | 148075                   | 197100  | 90905  | 96426                  | 115839  | 100471 |
| 2341                                  | 1455    | 1599   | 16189                    | 9442    | 8701   | 21229                             | 20993   | 18664  | 98888                    | 33905   | 24094  | 29115*                 | 67420*  | 37789* |

\*The mean of the first 12 entries in the column.



**Supplementary Table 2. The number of steps in MC-EMMA by policy.** Each column shows the numbers of steps required to find the global minimum in 40 runs of MC-EMMA for  $\text{YBa}_2\text{Ca}_2\text{Fe}_5\text{O}_{13}$  with a given policy. The bottom row highlighted in grey shows the mean number of steps among all 40 runs rounded to the nearest integer.

| Original | Uniform | RL-CSP |
|----------|---------|--------|
| 20       | 160     | 1      |
| 91       | 162     | 206    |
| 115      | 178     | 230    |
| 150      | 180     | 267    |
| 156      | 555     | 293    |
| 179      | 651     | 349    |
| 187      | 667     | 358    |
| 247      | 685     | 422    |
| 253      | 704     | 435    |
| 253      | 707     | 443    |
| 259      | 731     | 450    |
| 292      | 747     | 464    |
| 308      | 782     | 611    |
| 366      | 828     | 624    |
| 539      | 862     | 666    |
| 734      | 902     | 682    |
| 764      | 904     | 693    |
| 794      | 1003    | 873    |
| 929      | 1080    | 899    |
| 1077     | 1336    | 1059   |
| 1125     | 1363    | 1181   |
| 1148     | 1582    | 1251   |
| 1190     | 1725    | 1310   |
| 1365     | 1734    | 1323   |
| 1372     | 1893    | 1381   |
| 1787     | 2062    | 1680   |
| 1898     | 2252    | 1711   |
| 1995     | 2429    | 1757   |
| 2244     | 2639    | 1828   |
| 2266     | 2859    | 1828   |
| 2329     | 2904    | 1926   |
| 2515     | 3200    | 1957   |
| 2695     | 3531    | 2038   |
| 2957     | 3787    | 2091   |
| 2984     | 4185    | 2693   |
| 2995     | 4333    | 2831   |
| 3221     | 5454    | 3362   |
| 3594     | 5936    | 4214   |
| 4081     | 6807    | 4492   |
| 7434     | 11656   | 10273  |
| 1473     | 2154    | 1529   |

**Supplementary Table 3. Buckingham potential parameters used for calculations with FUSE**, as used in previous work<sup>1</sup>, all potentials use a cut-off distance of 12 Å.

| Interaction                        | A (eV)    | $\rho$ (Å) | C (eV Å <sup>-6</sup> ) |
|------------------------------------|-----------|------------|-------------------------|
| O <sup>2-</sup> - O <sup>2-</sup>  | 1388.77   | 0.36262    | 175                     |
| Y <sup>3+</sup> - O <sup>2-</sup>  | 23 000    | 0.24203    | 0                       |
| Sr <sup>2+</sup> - O <sup>2-</sup> | 1952.39   | 0.33685    | 19.22                   |
| Ti <sup>4+</sup> - O <sup>2-</sup> | 4590.7279 | 0.261      | 0                       |

**Supplementary Table 4. Buckingham potential parameters used for calculations with MC-EMMA**, as used in previous work<sup>2</sup>, all potentials use a cut-off distance of 12 Å. For these potentials, Ba, Ca and O atoms were modelled using a shell model, where a massless shell is attached to the core by a spring constant, and the charges between the shell and core set to give a combined total equal to the formal charge on the atom. The spring constants were 34.05, 34.05 and 42 eVÅ<sup>-2</sup> for Ba, Ca and O respectively. The charges on the shells were set to 1.831, 1.281 and -2.24 for Ba, Ca and O respectively.

| Interaction                        | A (eV)   | $\rho$ (Å) | C (eV Å <sup>-6</sup> ) |
|------------------------------------|----------|------------|-------------------------|
| O <sup>2-</sup> - O <sup>2-</sup>  | 22764.3  | 0.149      | 42                      |
| Y <sup>3+</sup> - O <sup>2-</sup>  | 20717.5  | 0.24203    | 0                       |
| Ba <sup>2+</sup> - O <sup>2-</sup> | 4818     | 0.3067     | 0                       |
| Fe <sup>3+</sup> - O <sup>2-</sup> | 1244.5   | 0.3299     | 0                       |
| Ca <sup>2+</sup> - O <sup>2-</sup> | 2272.741 | 0.2986     | 0                       |

## References

1. C. M. Collins, G. R. Darling and M. J. Rosseinsky, *Faraday Discuss*, 2018, **211**, 117-131.
2. C. Collins, M. Dyer, M. Pitcher, G. Whitehead, M. Zanella, P. Mandal, J. Claridge, G. Darling and M. Rosseinsky, *Nature*, 2017, **546**, 280-284.
3. A. H. Larsen, J. J. Mortensen, J. Blomqvist, I. E. Castelli, R. Christensen, M. Dułak, J. Friis, M. N. Groves, B. Hammer and C. Hargus, *Journal of Physics: Condensed Matter*, 2017, **29**, 273002.
4. J. D. Gale and A. L. Rohl, *Molecular Simulation*, 2003, **29**, 291-341.
